# Supplementary material for: Nano-biochar supported Zn delivery in plants to enhance seedling growth and ROS management in rice
Source: Royal Society of Chemistry journal article supplement (doi:10.1039/d4en00578c), 2025-01-01
Supplement: d4en00578c1.pdf [file d4en00578c1.pdf]

### Supplementary Information (SI)

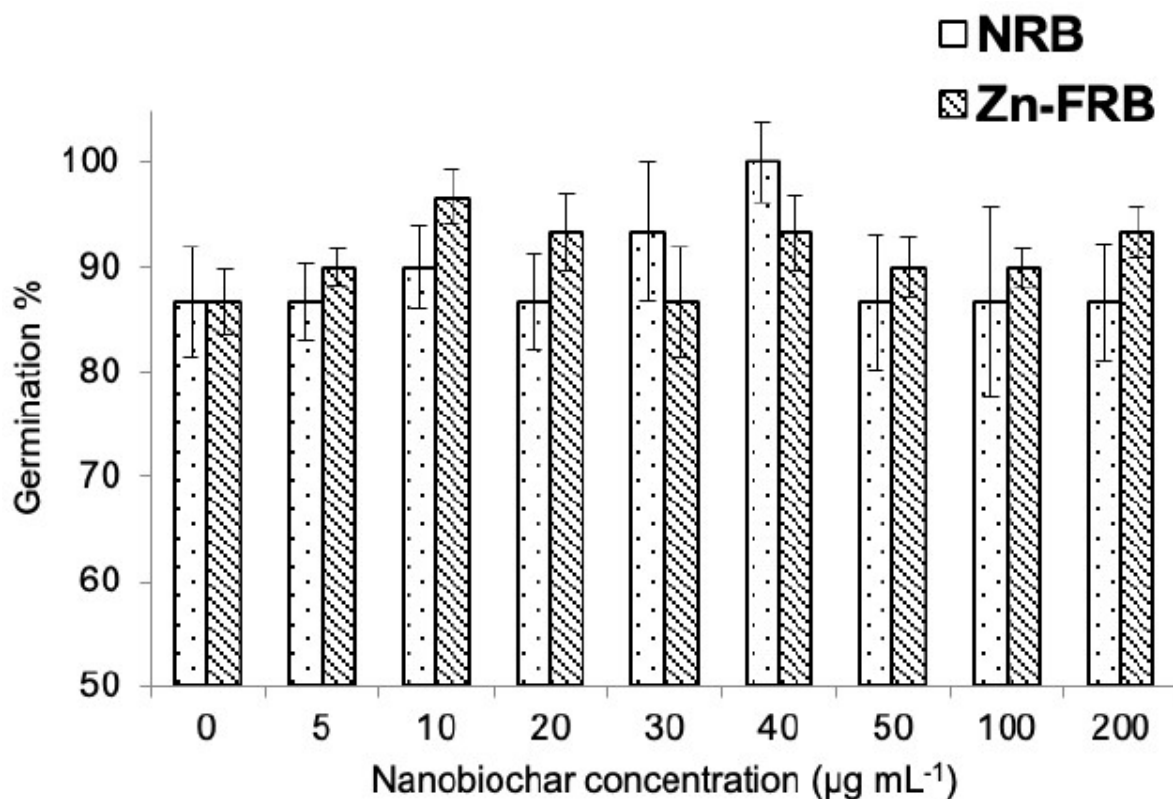

Fig. S1. Seed germination percentage of rice under the treatment of NRB and Zn-FRB with different concentration (0- 200  $\mu\text{g mL}^{-1}$ ); Error bars represent standard deviation from the mean (40 seeds per dose level)
